# Supplementary material for: Arsenic metabolism in high altitude modern stromatolites revealed by metagenomic analysis
Source: PubMed Central journal article supplement (PMC5430908; doi:10.1038/s41598-017-00896-0), 2017-04-21
Supplement: 41598_2017_896_MOESM1_ESM.pdf [file 41598_2017_896_MOESM1_ESM.pdf]

## Supplementary information

# Arsenic metabolism in high altitude modern stromatolites revealed by metagenomic analysis

**Daniel Kurth<sup>1</sup>, Ariel Amadio<sup>2</sup>, Omar F. Ordoñez<sup>1</sup>, Virginia H. Albarracín<sup>1,3</sup>, Wolfgang Gärtner<sup>4</sup>, María E. Farías<sup>1\*</sup>**

*<sup>1</sup>Planta Piloto de Procesos Industriales y Microbiológicos (PROIMI), CCT-Tucumán, CONICET, San Miguel de Tucumán, Argentina.*

*<sup>2</sup>E.E.A. Rafaela, Instituto Nacional de Tecnología Agropecuaria (INTA), Rafaela, CCT Santa Fe, CONICET, Argentina.*

*<sup>3</sup>Facultad de Ciencias Naturales e Instituto Miguel Lillo, Universidad Nacional de Tucumán, San Miguel de Tucumán, Argentina.*

*<sup>4</sup>Max-Planck Institute for Chemical Energy Conversion, Mülheim an der Ruhr, Germany.*

Supplementary Table S1. A. Assembly statistics for Socompa metagenome. B. Size distribution of contigs.

**A**

|                      | All         | Filtered*   |
|----------------------|-------------|-------------|
| <b>Contig number</b> | 391,949     | 79,915      |
| <b>Total bases</b>   | 374,092,121 | 219,061,845 |
| <b>Average</b>       | 954         | 2,741       |
| <b>Longest</b>       | 239,159     | 239,159     |
| <b>N50</b>           | 1,359       | 3,413       |
| <b>L50</b>           | 52,272      | 13,984      |
| <b>N90</b>           | 401         | 1,230       |
| <b>L90</b>           | 276,717     | 60,096      |

\*Filtered contigs are >1kbp

**B**

| Contig size | Contig number |
|-------------|---------------|
| > 5 kbp     | 7808          |
| > 10 kbp    | 2419          |
| > 50 kbp    | 92            |
| > 100 kbp   | 18            |

Supplementary Table S2. Abundance of selected COGs for carbon fixation, sulfate reduction and nitrogen cycle in Socompa metagenome.

| Process           | COG ID  | function                                                                               | COG abundance |
|-------------------|---------|----------------------------------------------------------------------------------------|---------------|
| Carbon fixation   | COG1850 | RuBisCO large chain, key enzyme for the CBB [EC:4.1.1.39]                              | 230           |
|                   | COG2301 | ATP-citrate lyase, enzyme representing the Arnon-Buchanan cycle (rTCA) [EC:2.3.3.8]    | 1655          |
|                   | COG2368 | 4-hydroxybutyryl dehydratase, key enzyme for the HP/HB and DC/HB cycles [EC:4.2.1.120] | 76            |
|                   | COG1614 | acetyl-CoA synthase [EC:2.3.1.169] (acsB)                                              | 235           |
| Sulfate reduction | COG2221 | Dissimilatory sulfite reductase (desulfoviridin), alpha and beta subunits              | 117           |
|                   | COG2046 | ATP sulfurylase (sulfate adenyltransferase)                                            | 1512          |
| Nitrogen cycle    | COG1251 | NAD(P)H-nitrite reductase                                                              | 430           |
|                   | COG5013 | Nitrate reductase alpha subunit                                                        | 1307          |
|                   | COG1140 | Nitrate reductase beta subunit                                                         | 738           |
|                   | COG3005 | Nitrate/TMAO reductases membrane-bound tetraheme cytochrome c subunit                  | 316           |
|                   | COG3303 | Formate-dependent nitrite reductase periplasmic cytochrome c552 subunit                | 240           |
|                   | COG4263 | Nitrous oxide reductase                                                                | 370           |
|                   | COG3256 | Nitric oxide reductase large subunit                                                   | 1574          |
|                   | COG1348 | Nitrogenase subunit NifH (ATPase)                                                      | 1066          |

Supplementary Table S3. Physicochemical data for water surrounding stromatolites and mats. Socompa data taken from reference 19. Shark Bay data taken from reference 48.

|                                     | Socompa       | Shark Bay        |                |
|-------------------------------------|---------------|------------------|----------------|
|                                     | stromatolites | Nilemah pustular | Nilemah smooth |
| Temperature (°C)                    | 20-24         | 16.4-32          | 17.3-30.8      |
| pH                                  | 8.6           | 7.8-8.5          | 7.5-8.4        |
| Salinity                            | -             | 62.3–65.3        | 61.2–65.0      |
| Conductivity (mS cm <sup>-1</sup> ) | 115           | -                | -              |
| Sodium (mg L <sup>-1</sup> )        | 37113         | 35900            | 17,600         |
| Potassium (mg L <sup>-1</sup> )     | 5298          | 1140             | 672            |
| Magnesium (mg L <sup>-1</sup> )     | 4090          | 3680             | 2050           |
| Calcium (mg L <sup>-1</sup> )       | 2383          | 1080             | 577            |
| Chloride (mg L <sup>-1</sup> )      | 52234         | 64000            | 32100          |
| Sulfate (mg L <sup>-1</sup> )       | 31847         | -                | -              |
| Total Sulfur (mg L <sup>-1</sup> )  | -             | 3130             | 1660           |

Supplementary Table S4. Families and thresholds used for NCBI CDD assignment.

| CD family ID | Gene name                  | function                                             | Threshold |
|--------------|----------------------------|------------------------------------------------------|-----------|
| COG0798      | Acr3                       | efflux pump                                          | 1.00E-10  |
| cd01118      | ArsB                       | efflux pump                                          | 1.00E-05  |
| cd02757      | ArrA                       | arsenate reductase respiratory, includes Arx oxidase | 1.00E-05  |
| cd02756      | AioA                       | arsenite oxidase respiratory                         | 1.00E-05  |
| cd03034      | ArsC-glutation dependent   | arsenate reductase                                   | 1.00E-10  |
| TIGR02691    | ArsC-thioredoxin dependent | arsenate reductase                                   | 1.00E-10  |
| PRK11873     | ArsM                       | arsenic methylase                                    | 1.00E-10  |
| cd02035      | ArsA                       | ATPase                                               | 1.00E-19  |
| TIGR02690    | ArsH                       | Unknown – proposed NADPH-dependent FMN reductase     | 1.00E-10  |
| pfam06953    | ArsD                       | Arsenical resistance operon trans-acting repressor   |           |
| cd00090      | ArsR                       | Arsenical resistance operon repressor                | 1.00E-05  |

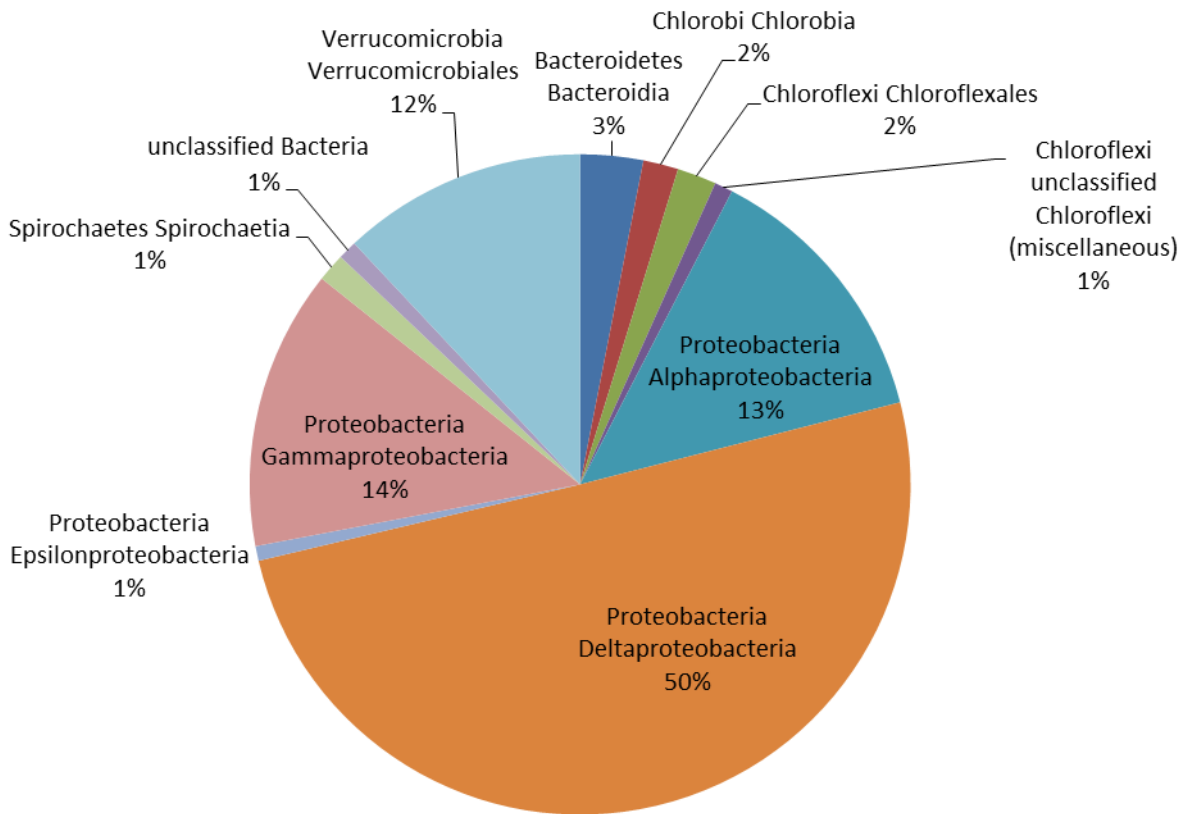

Supplementary Figure S1. Taxonomic affiliation (phylum and class) of nitrogenase sequences, based on BLAST best hits against NCBI nr database.

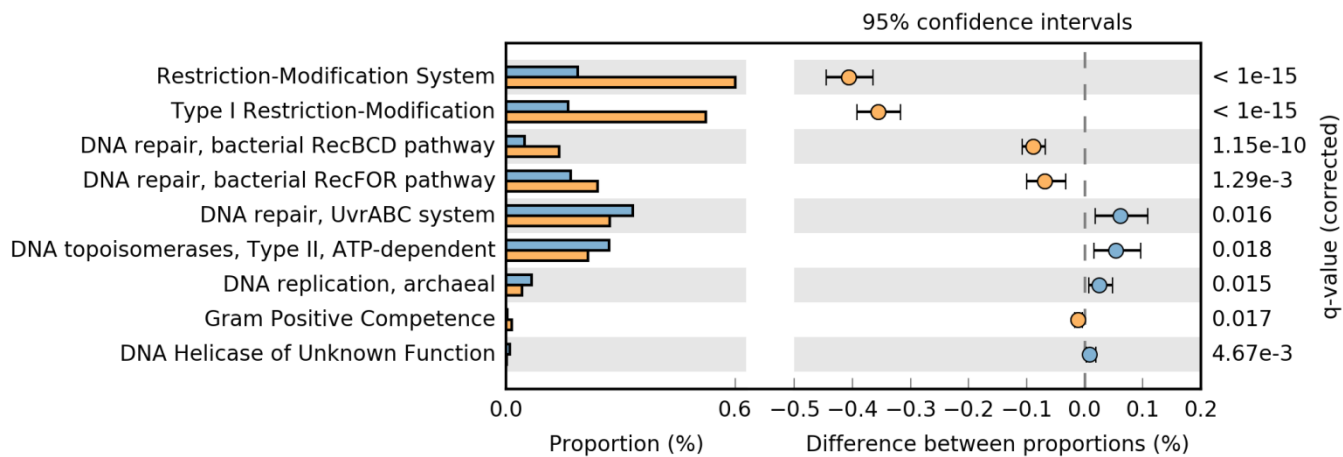

Supplementary Figure S2. Comparison of Shark Bay smooth mats and Socompa DNA metabolism classified by SEED subsystems at DNA metabolism level 3 using STAMP. Features displayed show significant differences.

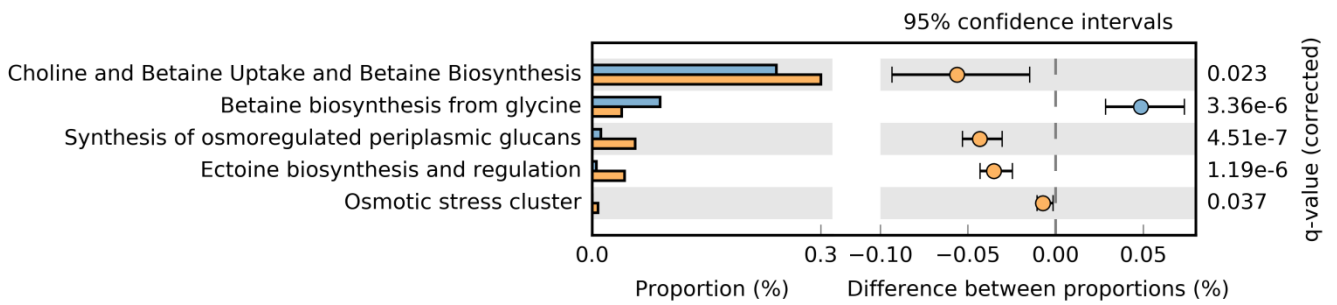

Supplementary Figure S3. Comparison of Shark Bay smooth mats and Socompa DNA metabolism classified by SEED subsystems at Stress reponse, Osmotic Stress level using STAMP. Features displayed show significant differences.



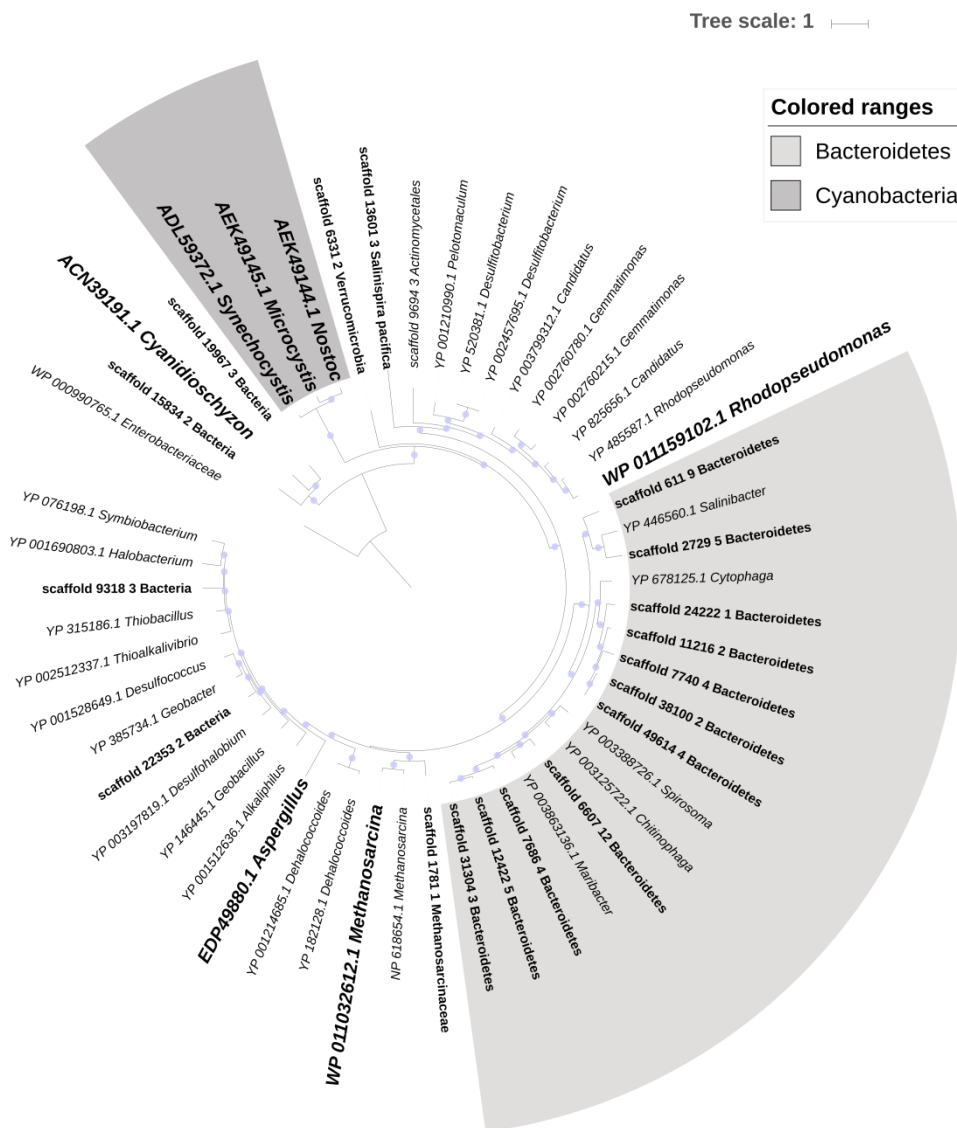

Supplementary Figure S4. ArsM arsenite methyltransferases tree. The tree is rooted with another type of methyltransferases. Nodes with bootstraps above 0.7 are marked with a circle. Groups phylogenetically homogeneous are shaded. Proteins whose activity has been experimentally confirmed have bigger font labels. Socompa proteins are named scaffold\_XXXX and have bolded labels.

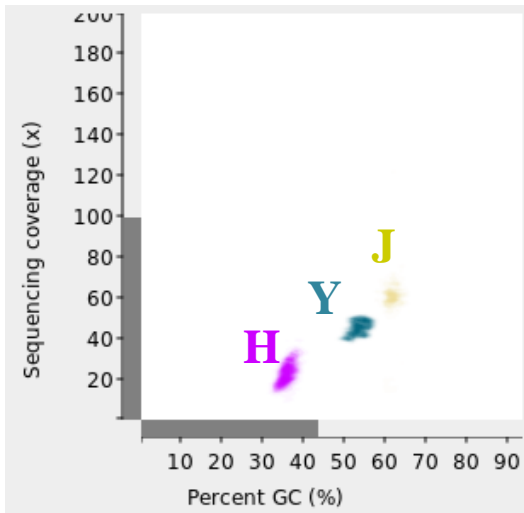

### Bin Y

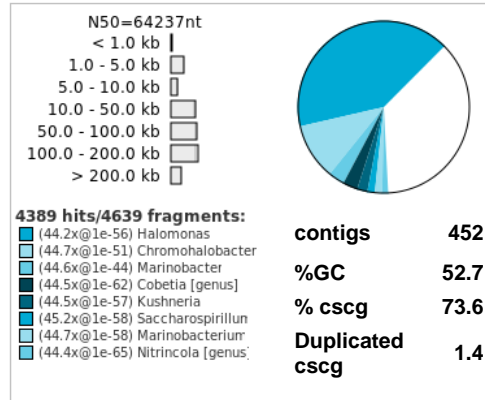

### Bin H

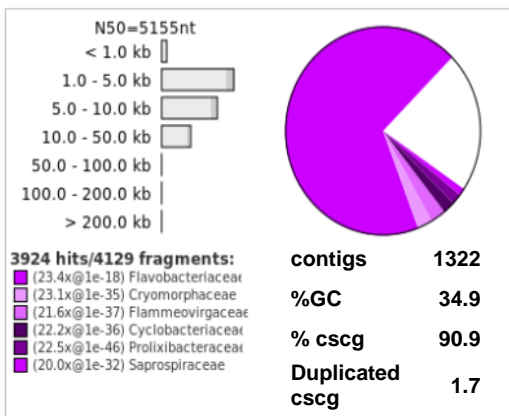

### Bin J

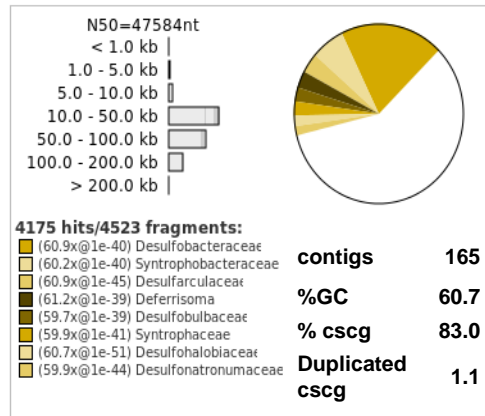

Supplementary Figure S5. Automatic binning of Socompa contigs performed by Metawatt 3.2. Selected and manually polished high quality bins are shown, including the affiliation of the encoded proteins for each bin.

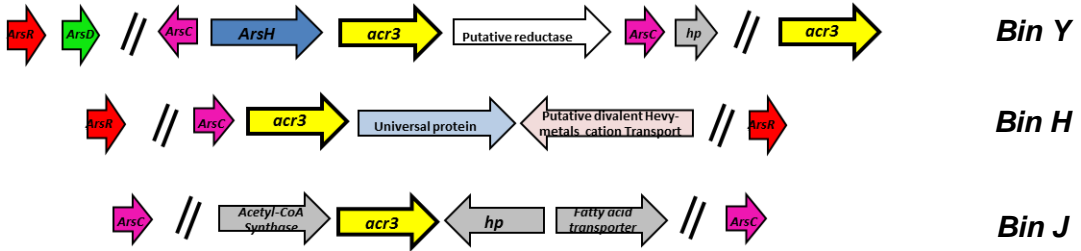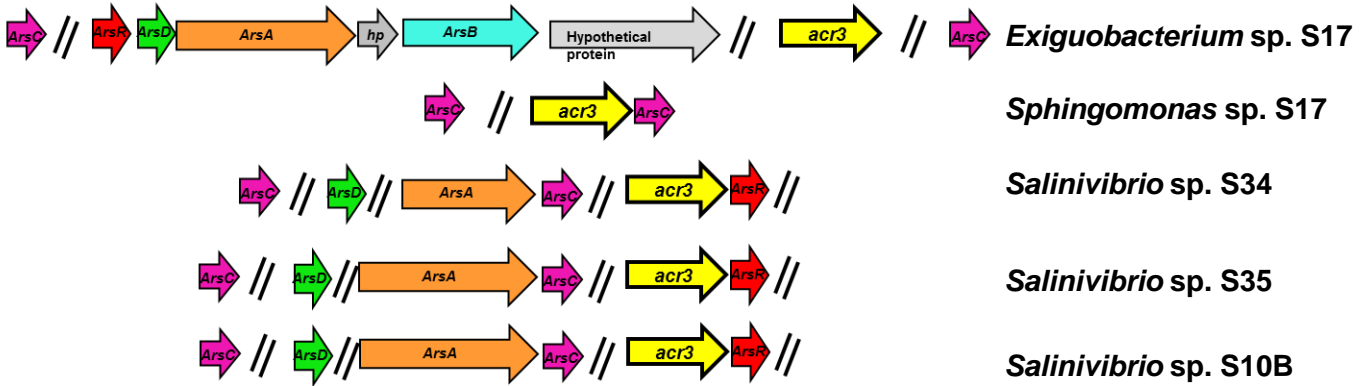

Supplementary Figure S6. Arsenic resistance genes in binned sequences from Socompa metagenome and in strains previously isolated from the stromatolites <sup>21,68,70</sup>.
